# Supplementary material for: Transparent Conducting Amorphous IZO Thin Films: An Approach to Improve the Transparent Electrode Quality
Source: MDPI journal article supplement (doi:10.3390/ma16103740), 2023-05-15
Supplement: s1 [file s1]

Supplementary Materials to the article

# Transparent Conducting Amorphous IZO Thin Films: An Approach to Improve the Transparent Electrode Quality

Akhmed K. Akhmedov <sup>1</sup>, Aslan Kh. Abduev <sup>2,3</sup>, Eldar K. Murliev <sup>1</sup>, Victor V. Belyaev <sup>2,3</sup> and Abil Sh. Asvarov <sup>1,\*</sup>

<sup>1</sup> Institute of Physics, Dagestan Research Center of Russian Academy Sciences, Yaragskogo Str., 94, 367015 Makhachkala, Russia

<sup>2</sup> Faculty of Physics and Mathematics, State University of Education, Very Voloshinoy Str. 24, 141014 Mytishchi, Russia

<sup>3</sup> RUDN University, 6, Miklukho-Maklay Str., 117898 Moscow, Russia

\* Correspondence: abil-as@list.ru

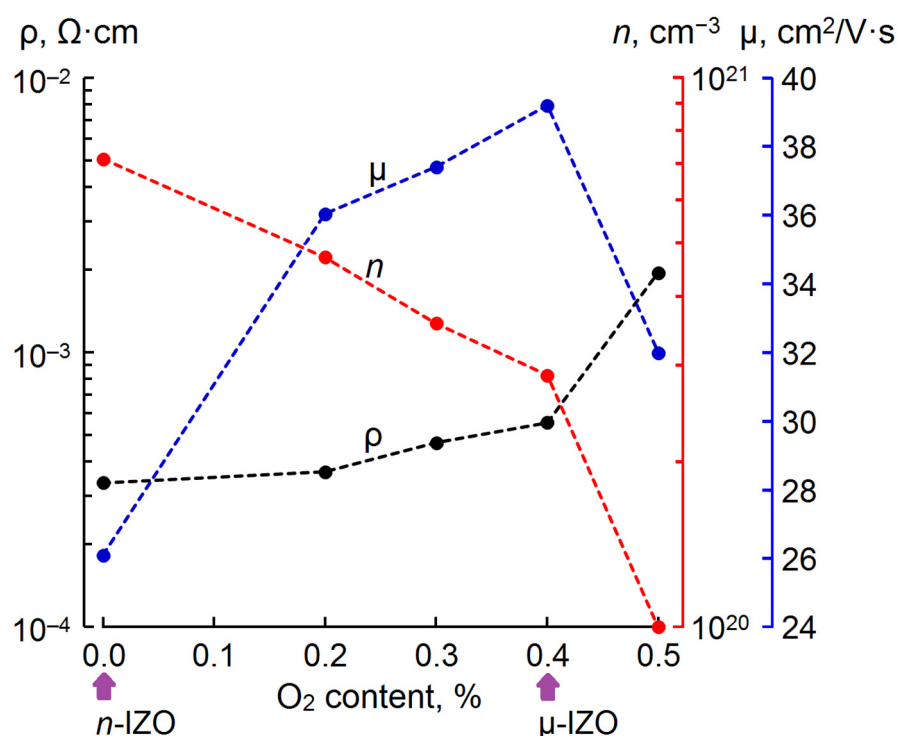

**Figure S1.** Electrical properties of the IZO thin films deposited at 100°C as a function of the O<sub>2</sub> content in the working gas.

Violet arrows mark the values of O<sub>2</sub> content at which *n*-IZO and *μ*-IZO unit layers of IZO-based multilayer structures were formed, respectively.

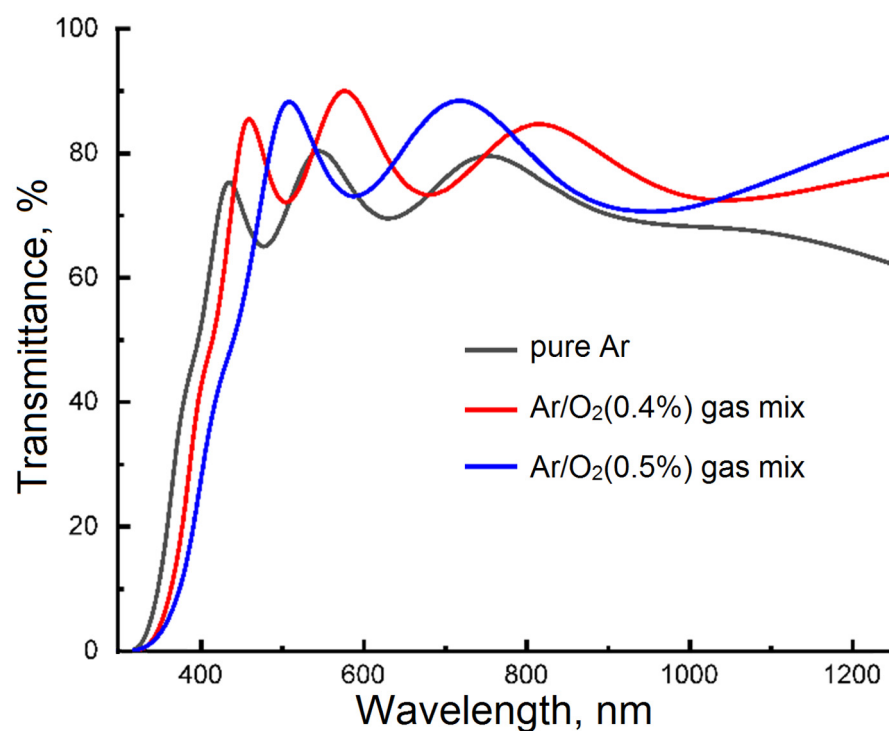

**Figure S2.** Optical transmittance of the IZO films deposited at substrate temperatures of 100 °C with varying O<sub>2</sub> contents.

It can be seen that, as the O<sub>2</sub> content decreases, the absorption edge of IZO/glass samples shifts to shorter wavelengths, but the overall level of optical transmission in the “transparency window” of IZO TCO samples decreases.

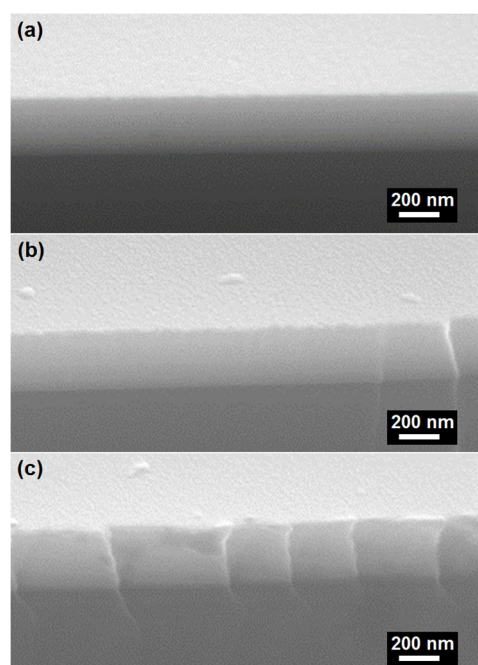

**Figure S3.** SEM morphology images of the IZO films deposited under various O<sub>2</sub> content: a – pure Ar; b – Ar/O<sub>2</sub>(0.4%); c – Ar/O<sub>2</sub>(0.5%).

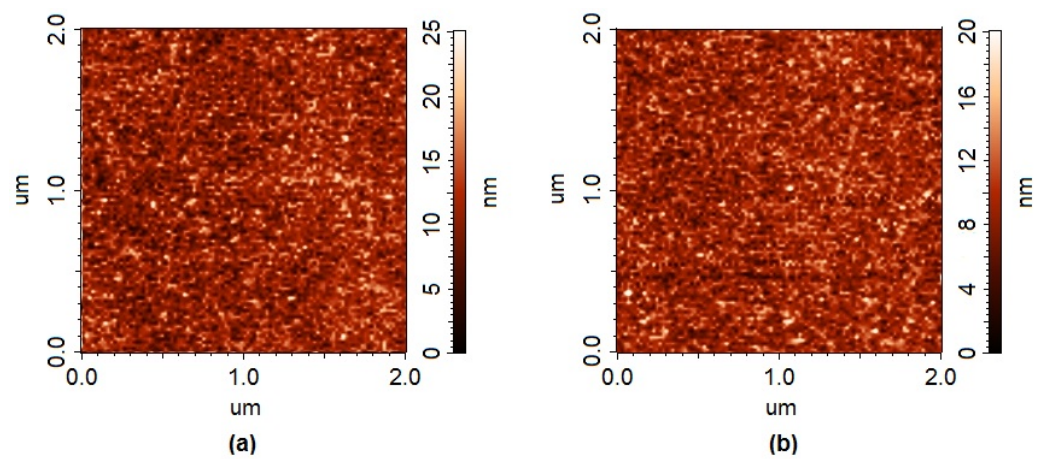

**Figure S4.** 2D AFM images of the surface of the  $N \times [n\text{-IZO}_{2\text{ nm}}/\mu\text{-IZO}_{2\text{ nm}}]$  ML (a) and  $N \times [n\text{-IZO}_{4\text{ nm}}/\mu\text{-IZO}_{2\text{ nm}}]$  ML (b).
